# Supplementary material
Source: MDPI journal article supplement (https://www.mdpi.com/2297-8739/10/2/136)
Supplement: s1 [file s1]

Supplementary Material

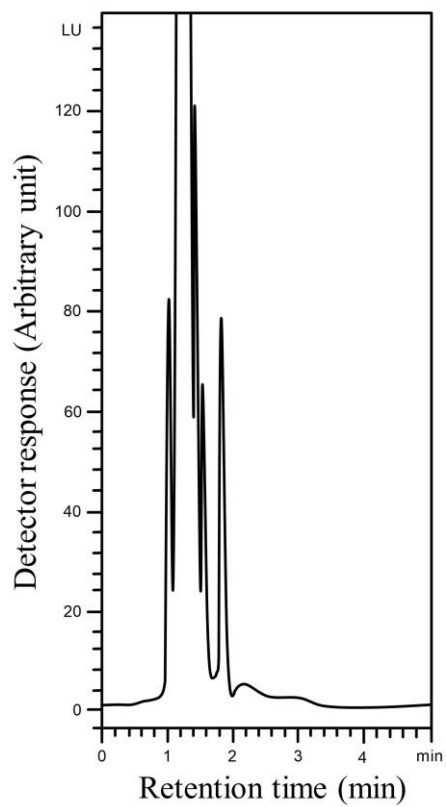

**Figure S1.** Chromatogram of drug-free human serum sample (volunteer 1).

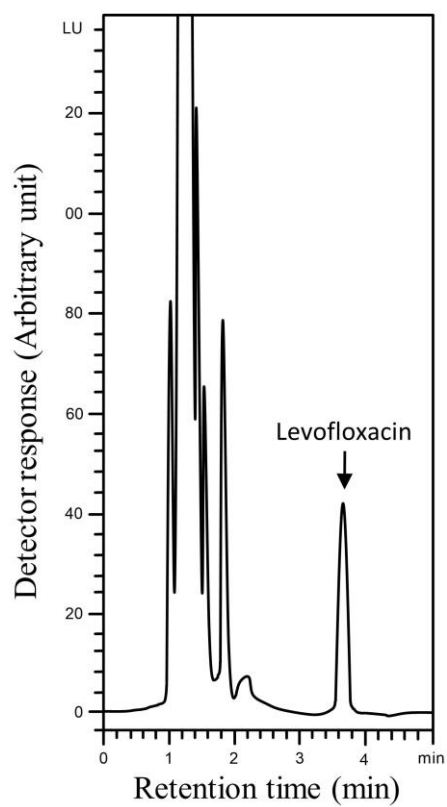

**Figure S2.** Chromatogram of serum sample collected at 0.5 h after the administration of a single 500 mg dose levofloxacin tablet (volunteer 1).

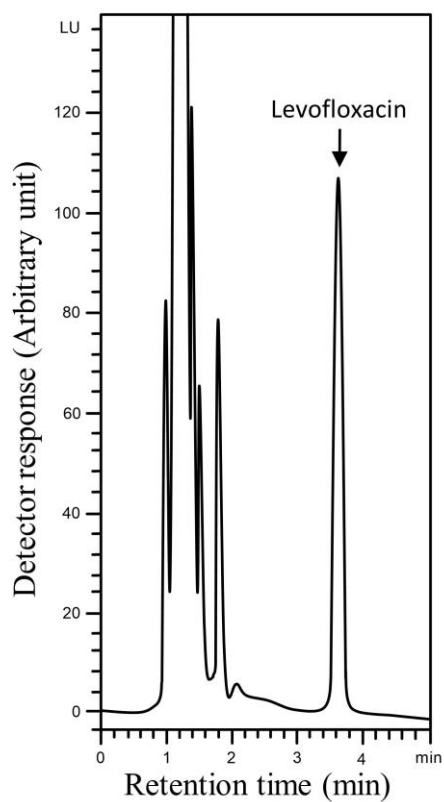

**Figure S3.** Chromatogram of serum sample collected at 1 h after the administration of a single 500 mg dose levofloxacin tablet (volunteer 1).

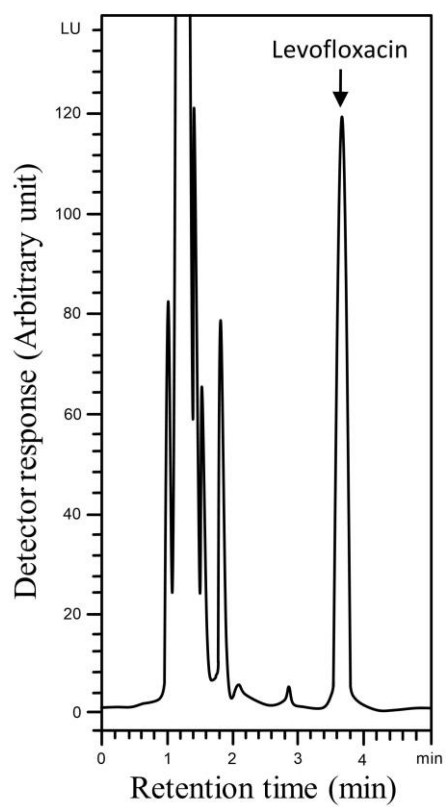

**Figure S4.** Chromatogram of serum sample collected at 2 h after the administration of a single 500 mg dose levofloxacin tablet (volunteer 1).

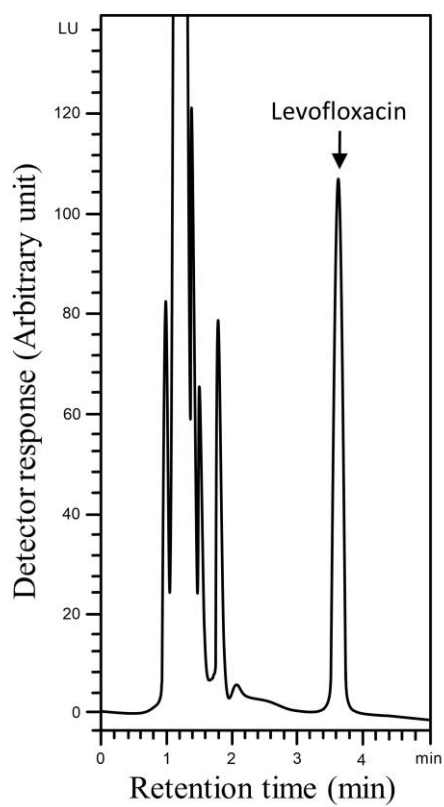

**Figure S5.** Chromatogram of serum sample collected at 3 h after the administration of a single 500 mg dose levofloxacin tablet (volunteer 1).

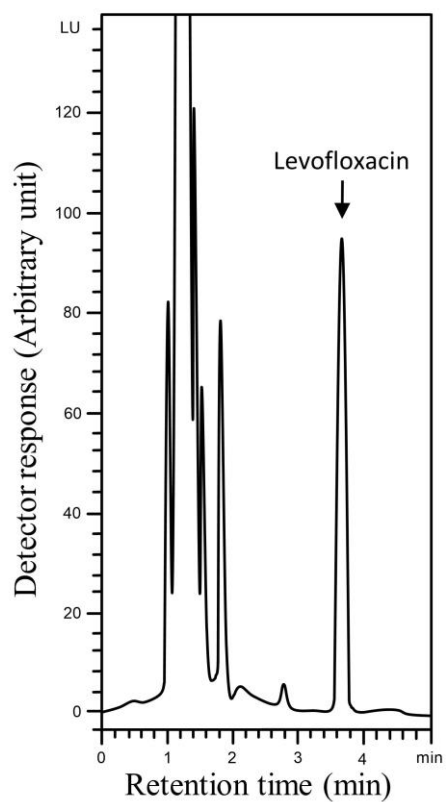

**Figure S6.** Chromatogram of serum sample collected at 4 h after the administration of a single 500 mg dose levofloxacin tablet (volunteer 1).

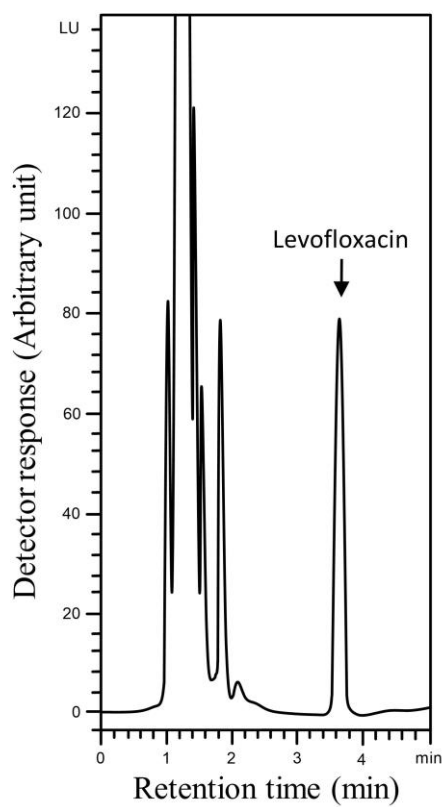

**Figure S7.** Chromatogram of serum sample collected at 6 h after the administration of a single 500 mg dose levofloxacin tablet (volunteer 1).

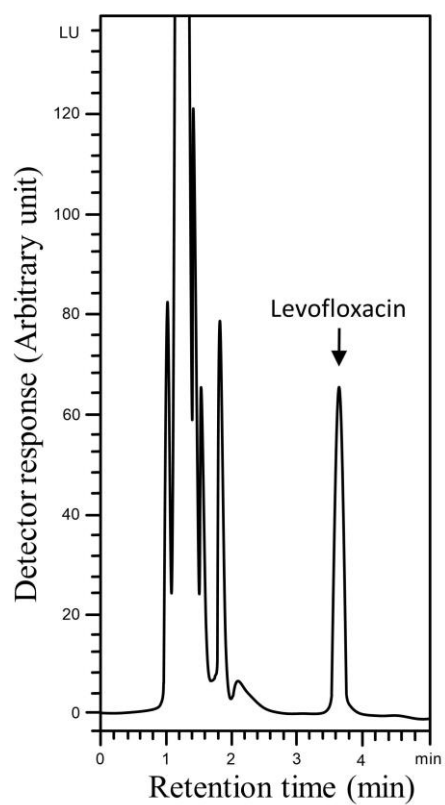

**Figure S8.** Chromatogram of serum sample collected at 8 h after the administration of a single 500 mg dose levofloxacin tablet (volunteer 1).

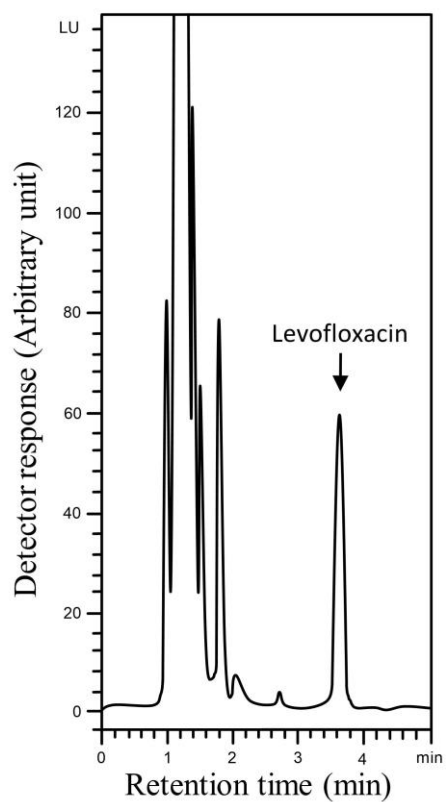

**Figure S9.** Chromatogram of serum sample collected at 10 h after the administration of a single 500 mg dose levofloxacin tablet (volunteer 1).

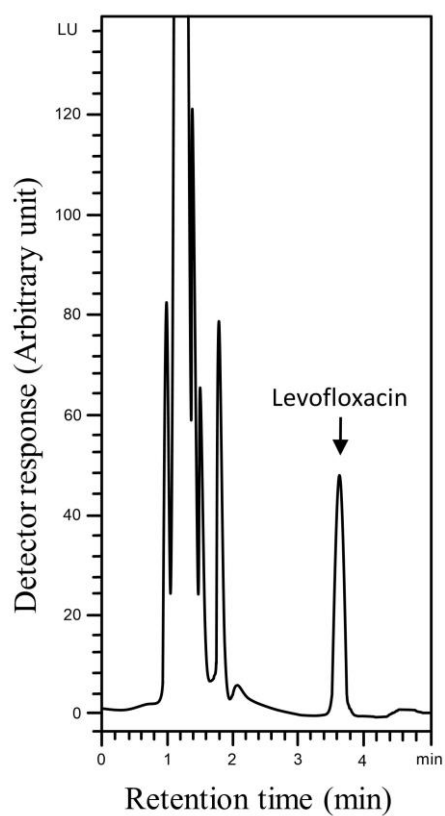

**Figure S10.** Chromatogram of serum sample collected at 12 h after the administration of a single 500 mg dose levofloxacin tablet (volunteer 1).

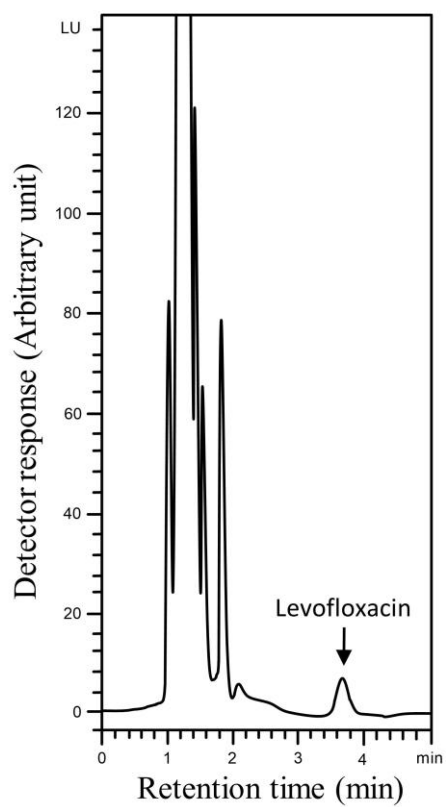

**Figure S11.** Chromatogram of serum sample collected at 24 h after the administration of a single 500 mg dose levofloxacin tablet (volunteer 1).

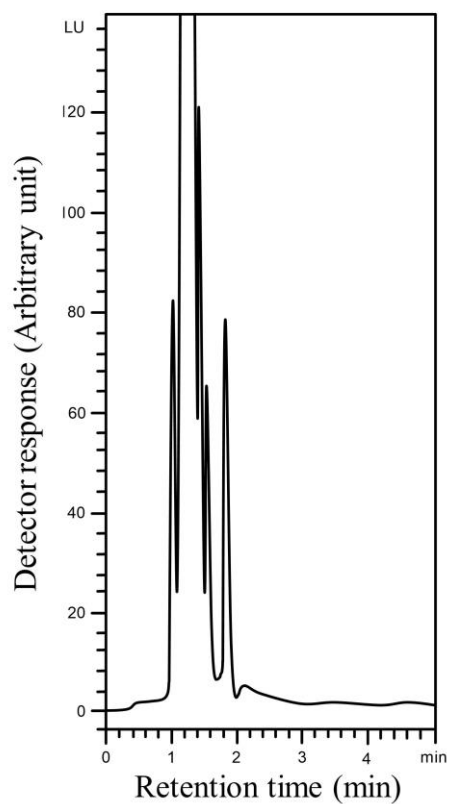

**Figure S12.**Chromatogram of drug-free human serum sample (volunteer 2).

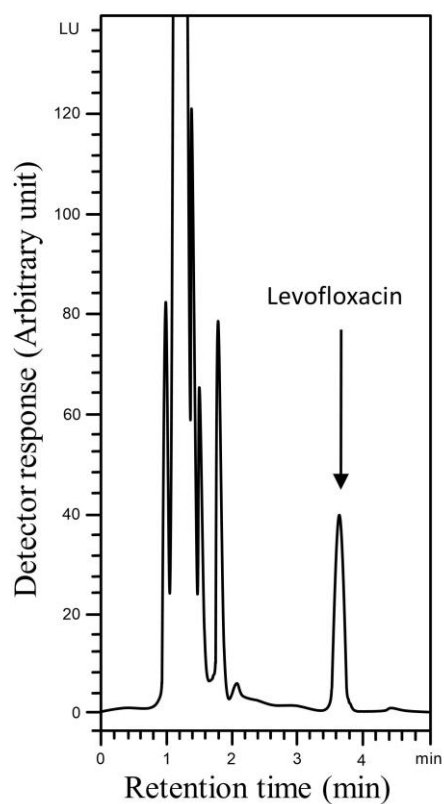

**Figure S13.** Chromatogram of serum sample collected at 0.5 h after the administration of a single 500 mg dose levofloxacin tablet (volunteer 2)

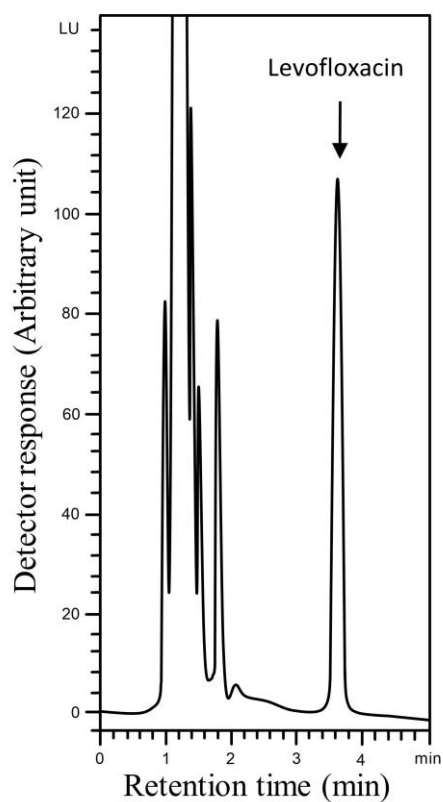

**Figure S14.** Chromatogram of serum sample collected at 1 h after the administration of a single 500 mg dose levofloxacin tablet (volunteer 2).

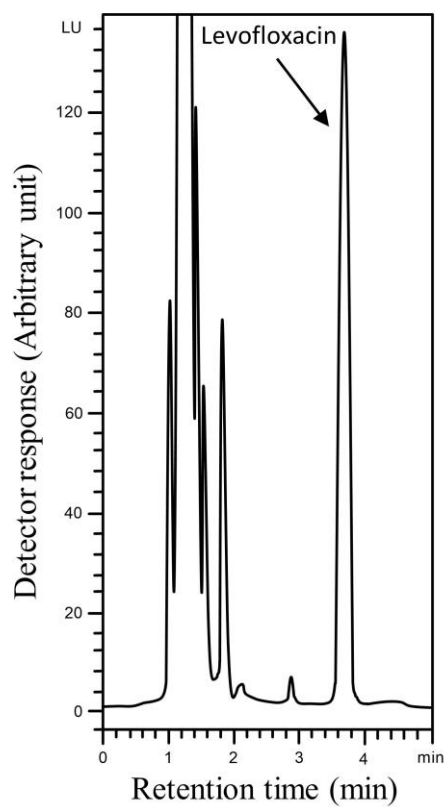

**Figure S15.** Chromatogram of serum sample collected at 2 h after the administration of a single 500 mg dose levofloxacin tablet (volunteer 2).

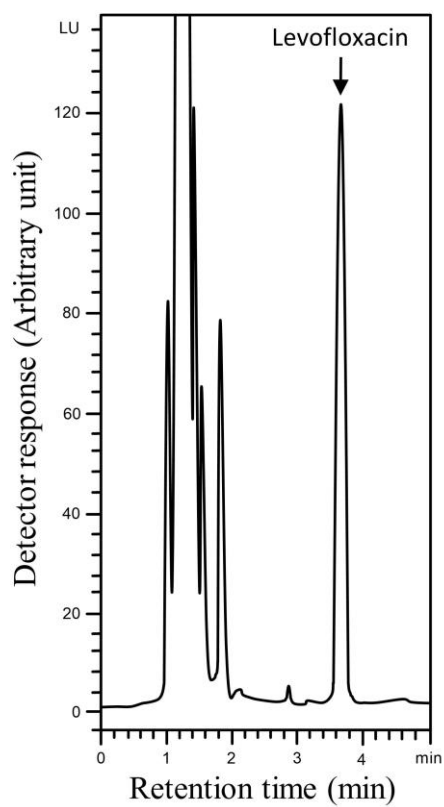

**Figure S16.** Chromatogram of serum sample collected at 3 h after the administration of a single 500 mg dose levofloxacin tablet (volunteer 2).

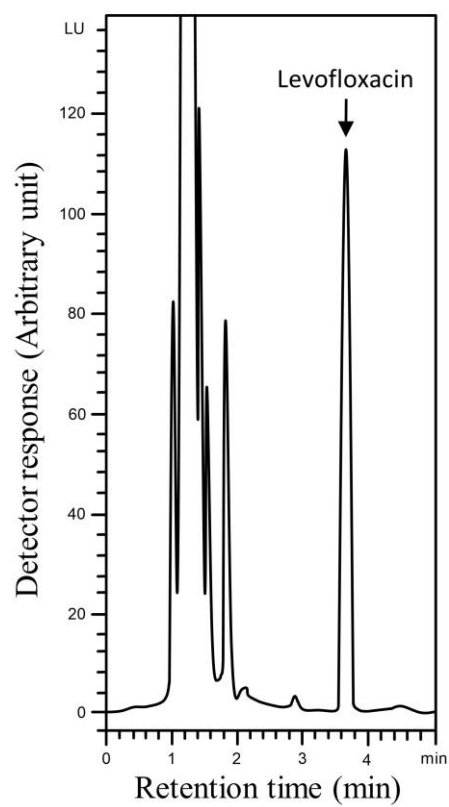

**Figure S17.** Chromatogram of serum sample collected at 4 h after the administration of a single 500 mg dose levofloxacin tablet (volunteer 2).

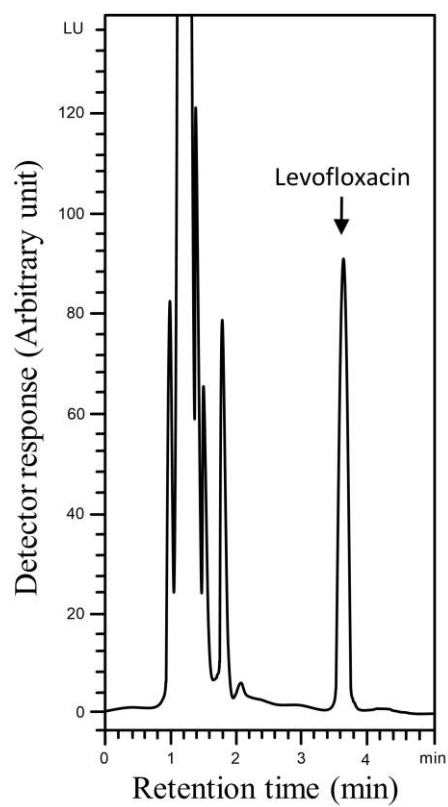

**Figure S18.** Chromatogram of serum sample collected at 6 h after the administration of a single 500 mg dose levofloxacin tablet (volunteer 2).

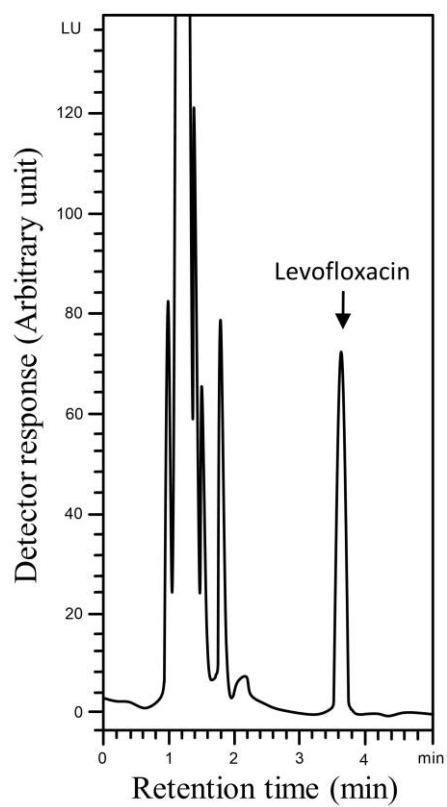

**Figure S19.** Chromatogram of serum sample collected at 8 h after the administration of a single 500 mg dose levofloxacin tablet (volunteer 2).

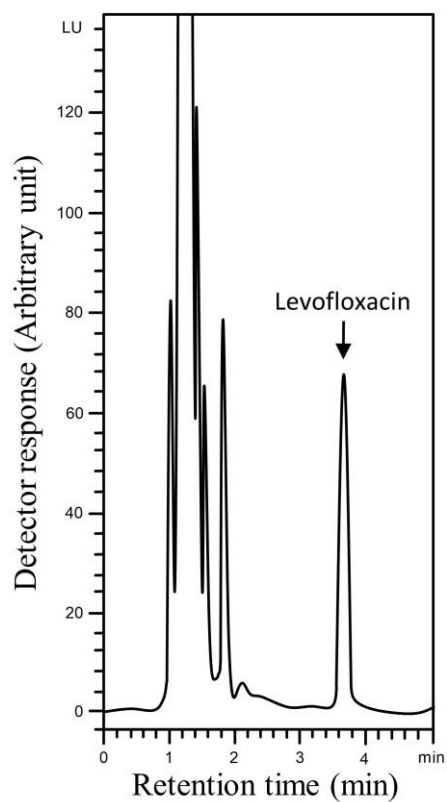

**Figure S20.** Chromatogram of serum sample collected at 10 h after the administration of a single 500 mg dose levofloxacin tablet (volunteer 2).

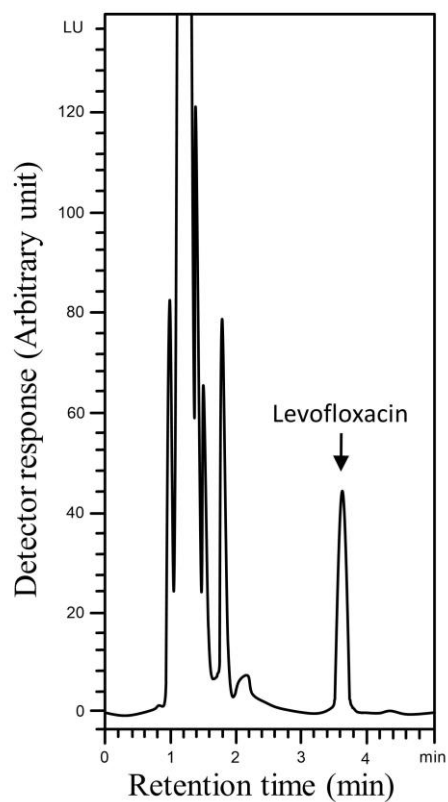

**Figure S21.** Chromatogram of serum sample collected at 12 h after the administration of a single 500 mg dose levofloxacin tablet (volunteer 2).

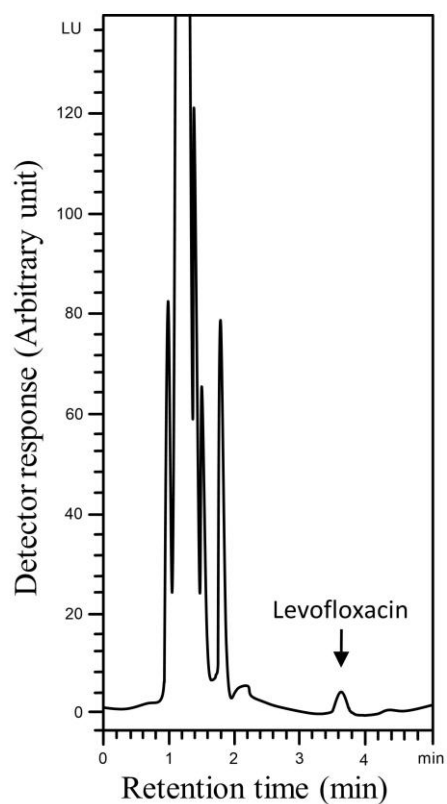

**Figure S22.** Chromatogram of serum sample collected at 24 h after the administration of a single 500 mg dose levofloxacin tablet (volunteer 2).

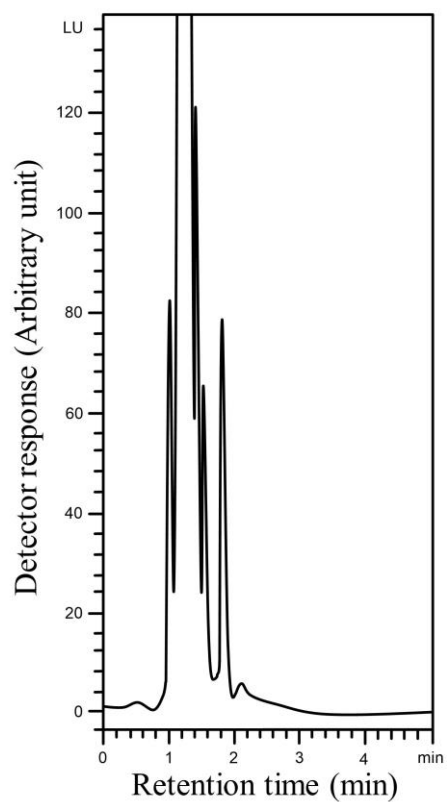

**Figure S23.** Chromatogram of drug-free human serum sample (volunteer 3).

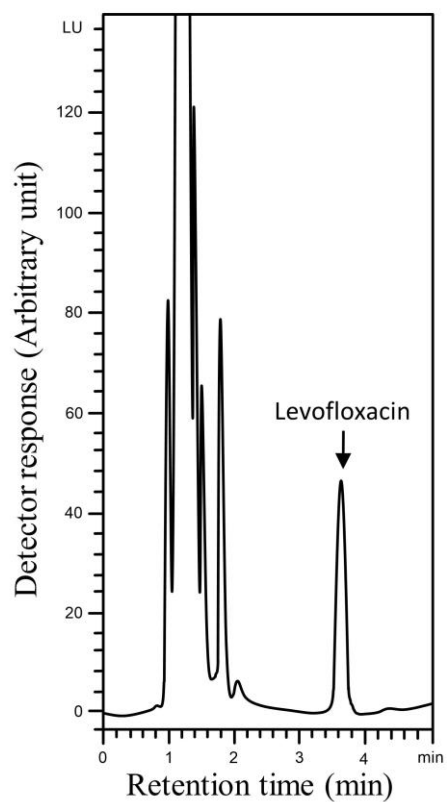

**Figure S24.** Chromatogram of serum sample collected at 0.5 h after the administration of a single 500 mg dose levofloxacin tablet (volunteer 3).



**Figure S25.** Chromatogram of serum sample collected at 1 h after the administration of a single 500 mg dose levofloxacin tablet (volunteer 3).

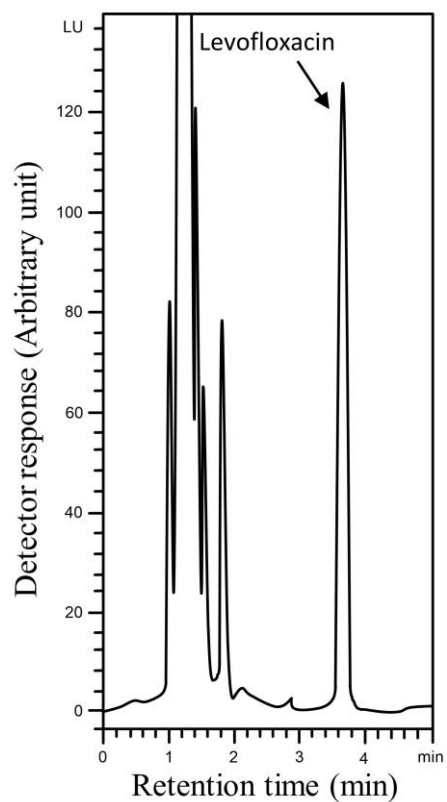

**Figure S26.** Chromatogram of serum sample collected at 2 h after the administration of a single 500 mg dose levofloxacin tablet (volunteer 3).

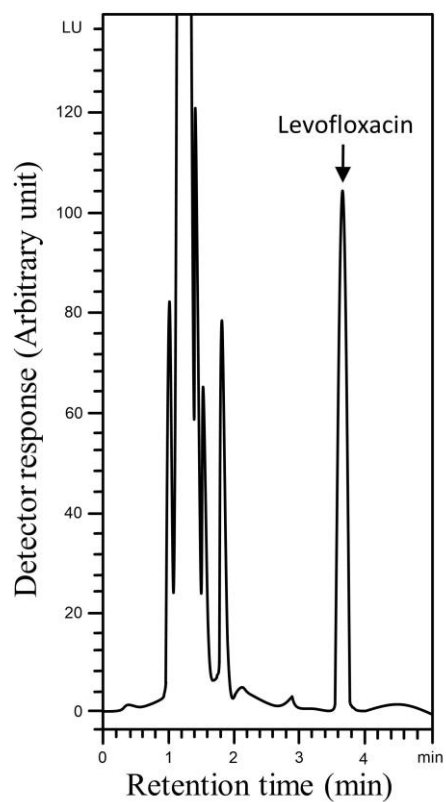

**Figure S27.** Chromatogram of serum sample collected at 3 h after the administration of a single 500 mg dose levofloxacin tablet (volunteer 3).

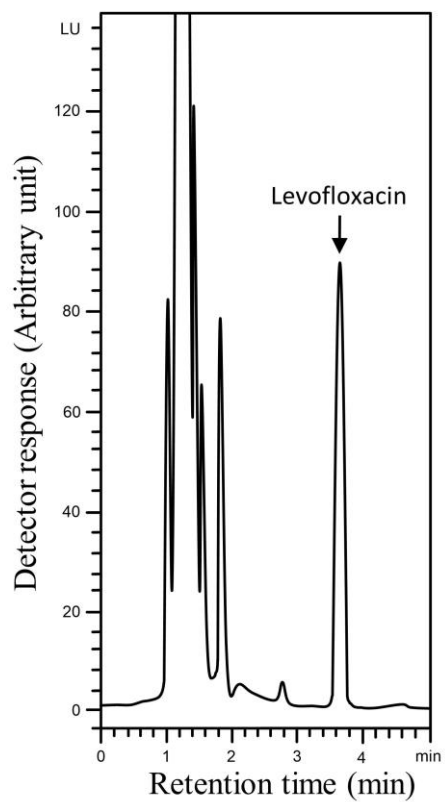

**Figure S28.** Chromatogram of serum sample collected at 4 h after the administration of a single 500 mg dose levofloxacin tablet (volunteer 3)

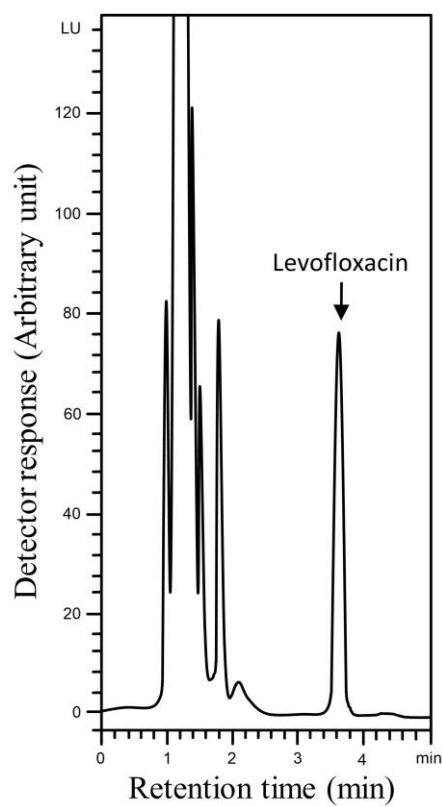

**Figure S29.** Chromatogram of serum sample collected at 6 h after the administration of a single 500 mg dose levofloxacin tablet (volunteer 3).

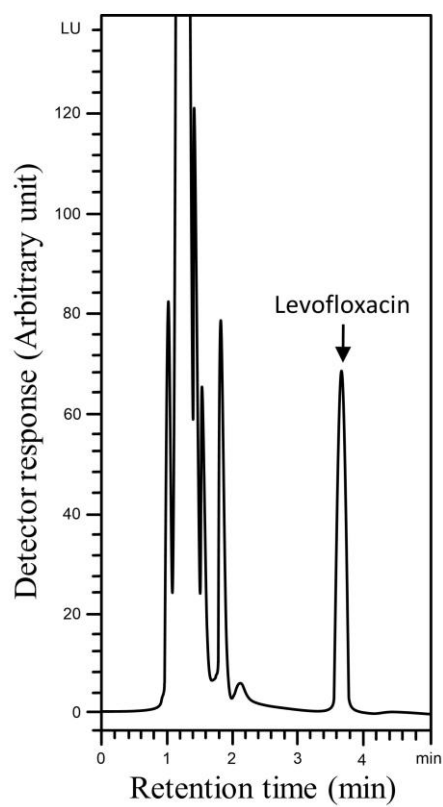

**Figure S30.** Chromatogram of serum sample collected at 8 h after the administration of a single 500 mg dose levofloxacin tablet (volunteer 3).

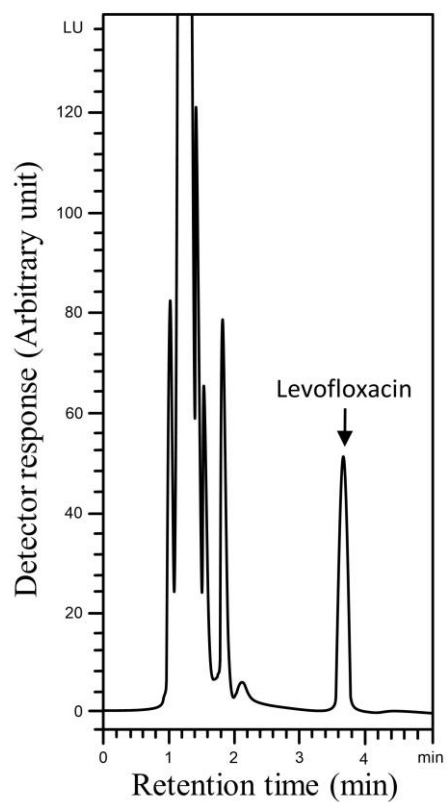

**Figure S31.** Chromatogram of serum sample collected at 10 h after the administration of a single 500 mg dose levofloxacin tablet (volunteer 3).

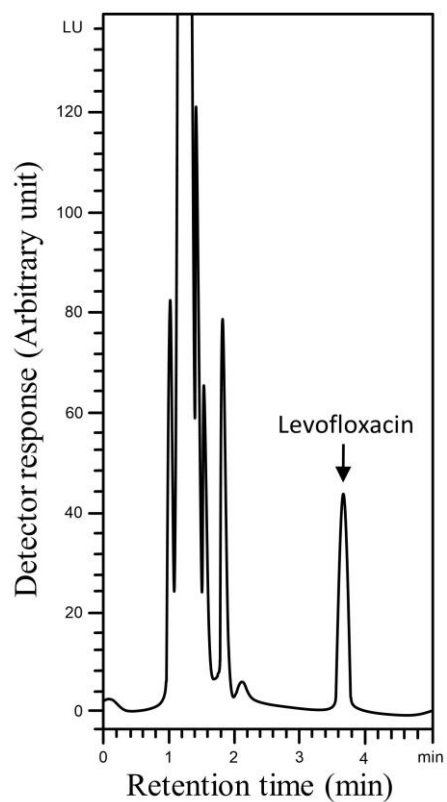

**Figure S32.** Chromatogram of serum sample collected at 12 h after the administration of a single 500 mg dose levofloxacin tablet (volunteer 3).

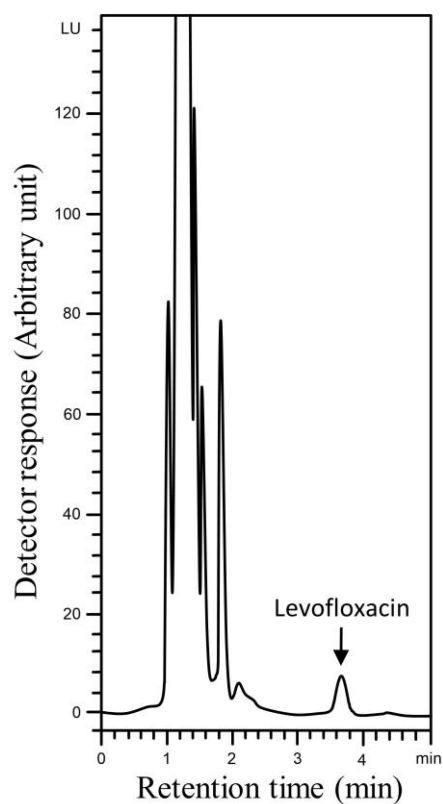

**Figure S33.** Chromatogram of serum sample collected at 24 h after the administration of a single 500 mg dose levofloxacin tablet (volunteer 3)

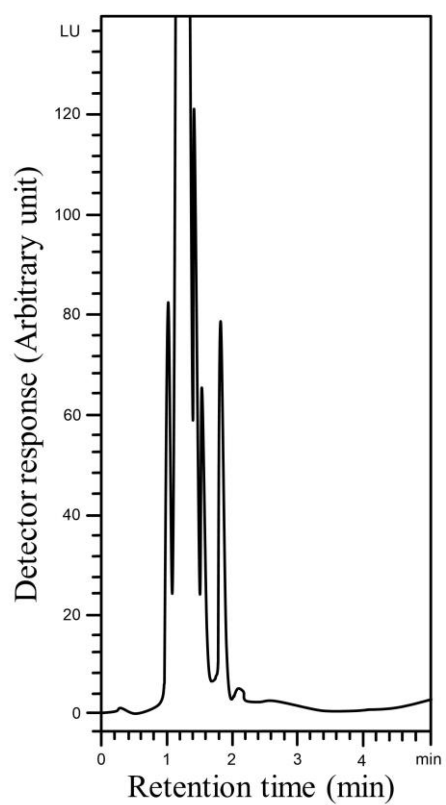

**Figure S34.** Chromatogram of drug-free human serum sample (volunteer 4).

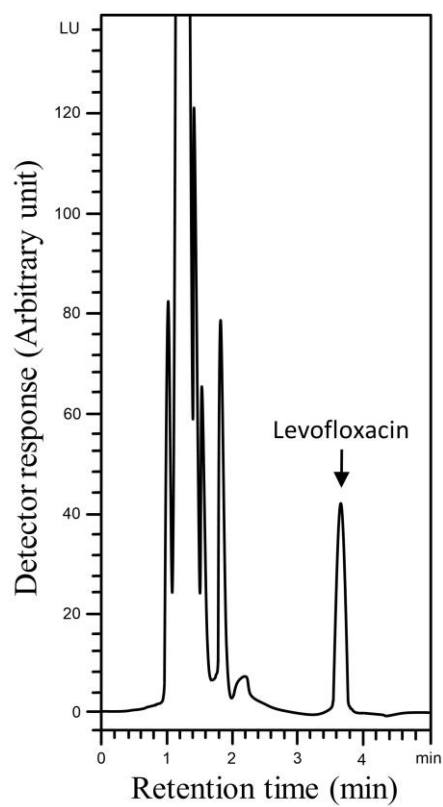

**Figure S35.** Chromatogram of serum sample collected at 0.5 h after the administration of a single 500 mg dose levofloxacin tablet (volunteer 4).

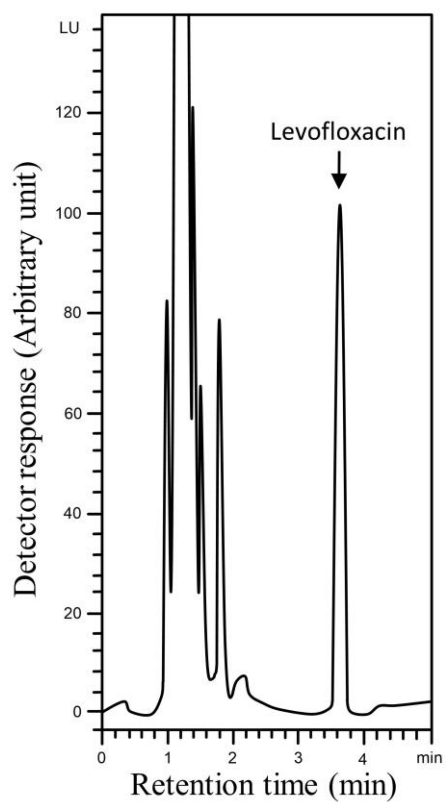

**Figure S36.** Chromatogram of serum sample collected at 1 h after the administration of a single 500 mg dose levofloxacin tablet (volunteer 4).

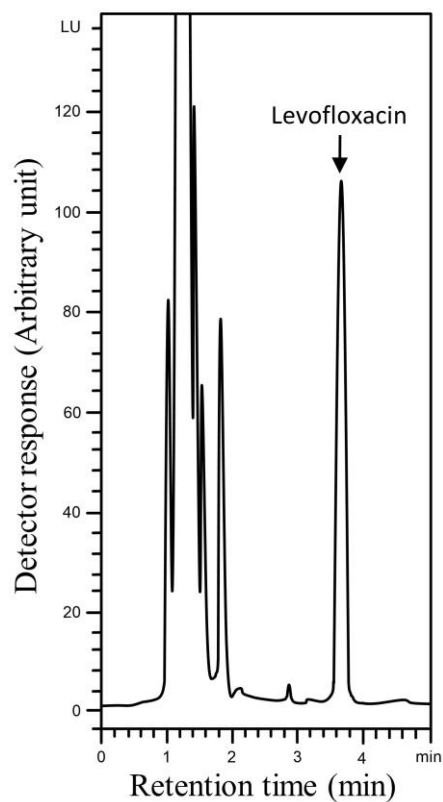

**Figure S37.** Chromatogram of serum sample collected at 2 h after the administration of a single 500 mg dose levofloxacin tablet (volunteer 4).

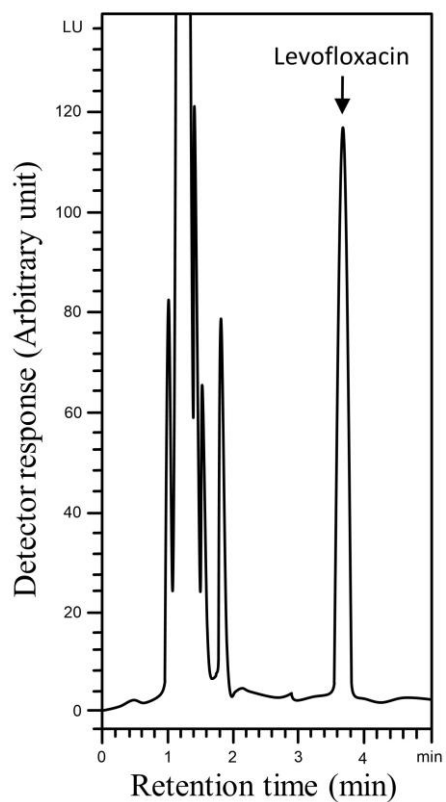

**Figure S38.** Chromatogram of serum sample collected at 3 h after the administration of a single 500 mg dose levofloxacin tablet (volunteer 4).

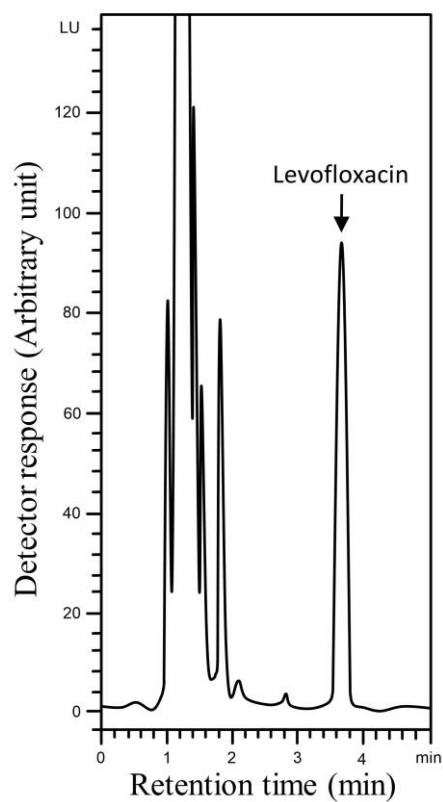

**Figure S39.** Chromatogram of serum sample collected at 4 h after the administration of a single 500 mg dose levofloxacin tablet (volunteer 4).

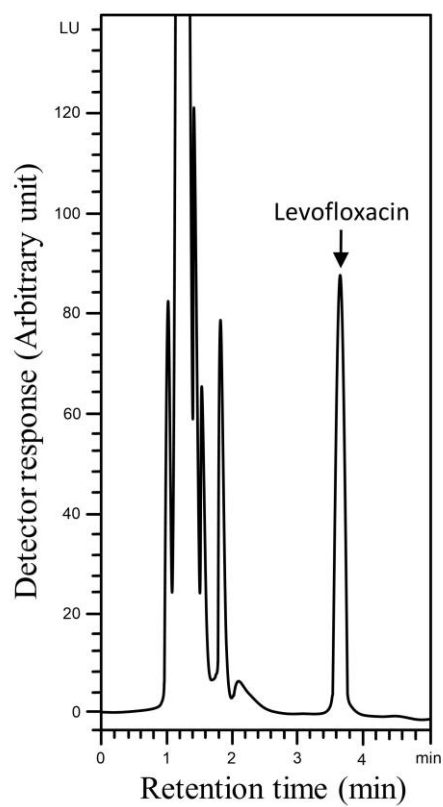

**Figure S40.** Chromatogram of serum sample collected at 6 h after the administration of a single 500 mg dose levofloxacin tablet (volunteer 4).

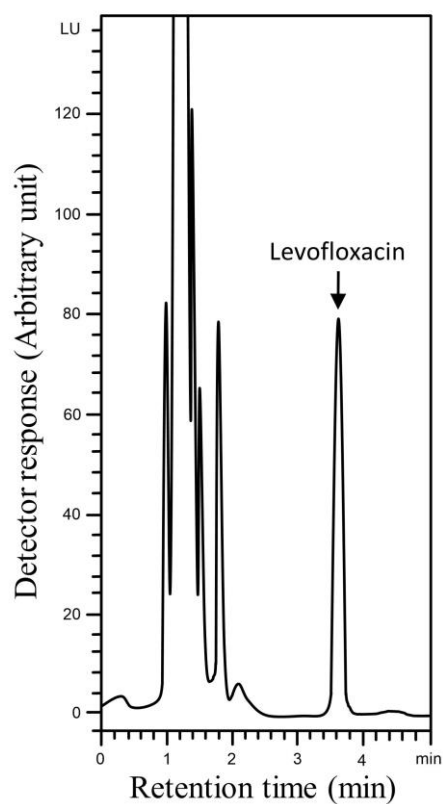

**Figure S41.** Chromatogram of serum sample collected at 8 h after the administration of a single 500 mg dose levofloxacin tablet (volunteer 4).

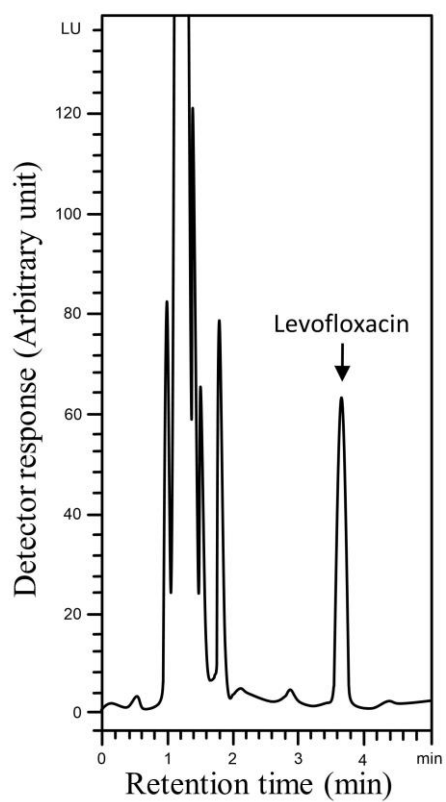

**Figure S42.** Chromatogram of serum sample collected at 10 h after the administration of a single 500 mg dose levofloxacin tablet (volunteer 4).

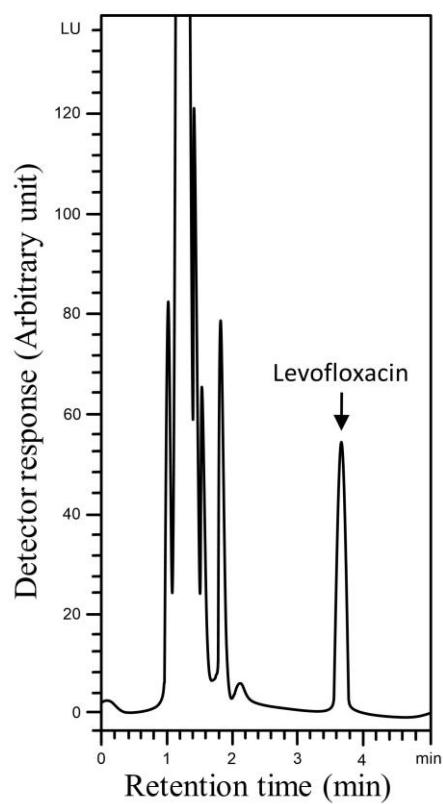

**Figure S43.** Chromatogram of serum sample collected at 12 h after the administration of a single 500 mg dose levofloxacin tablet (volunteer 4).

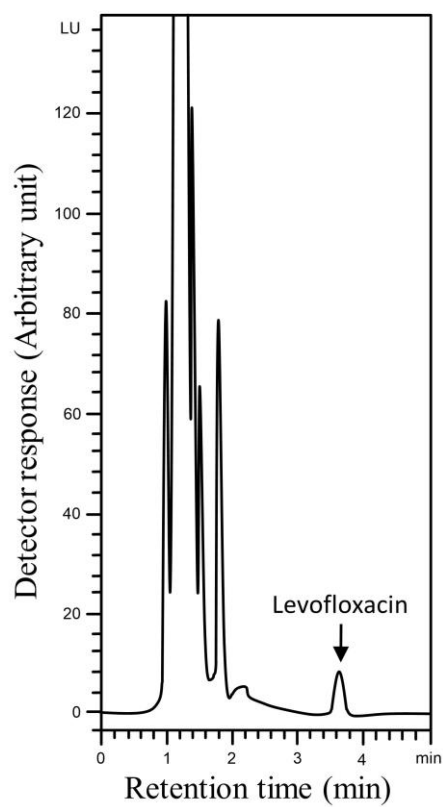

**Figure S44.** Chromatogram of serum sample collected at 24 h after the administration of a single 500 mg dose levofloxacin tablet (volunteer 4).

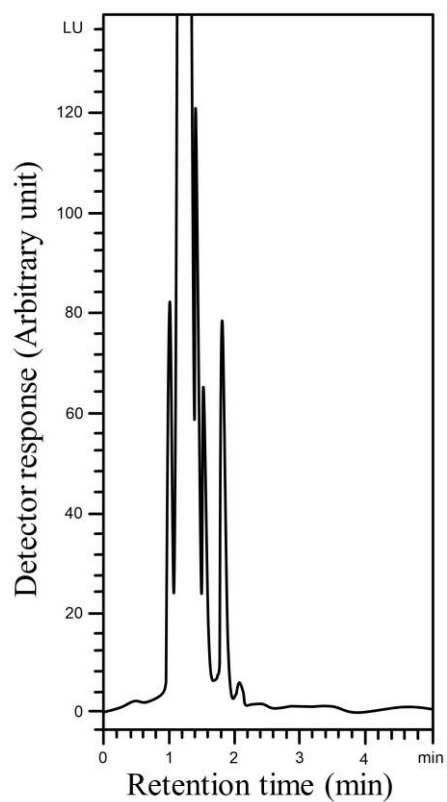

**Figure S45.** Chromatogram of drug-free human serum sample (volunteer 5).

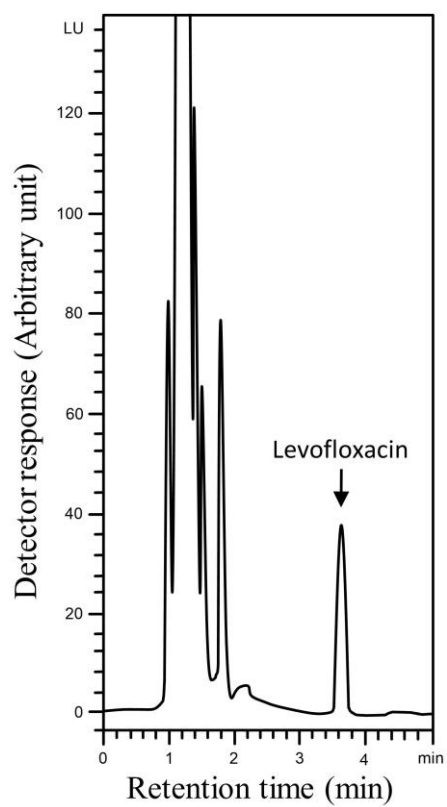

**Figure S46.** Chromatogram of serum sample collected at 0.5 h after the administration of a single 500 mg dose levofloxacin tablet (volunteer 5).

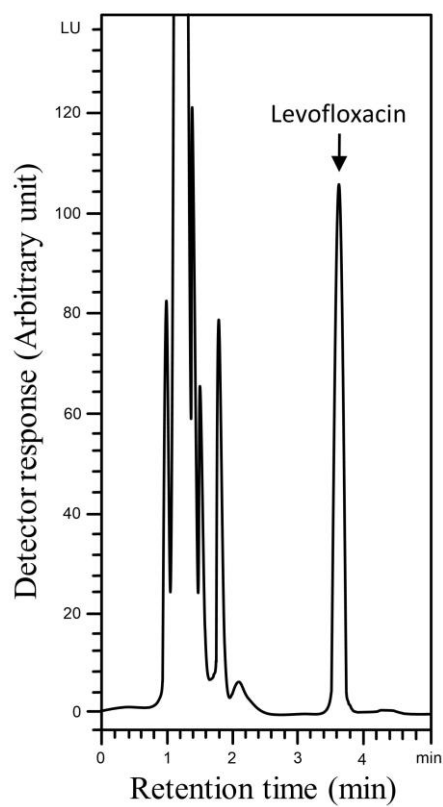

**Figure S47.** Chromatogram of serum sample collected at 1 h after the administration of a single 500 mg dose levofloxacin tablet (volunteer 5).

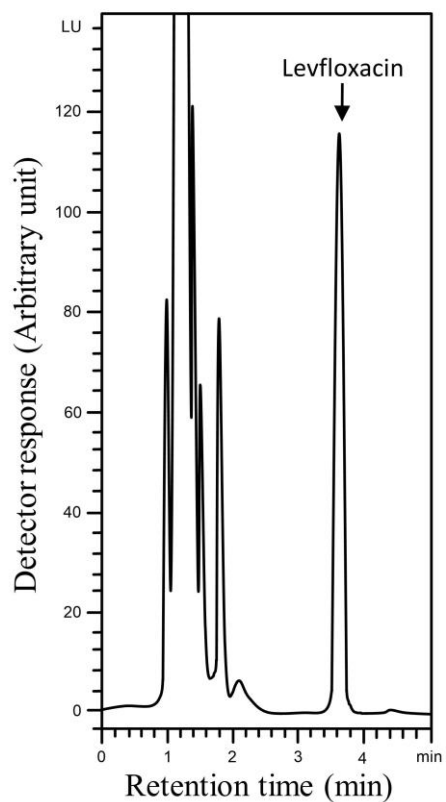

**Figure S48.** Chromatogram of serum sample collected at 2 h after the administration of a single 500 mg dose levofloxacin tablet (volunteer 5).

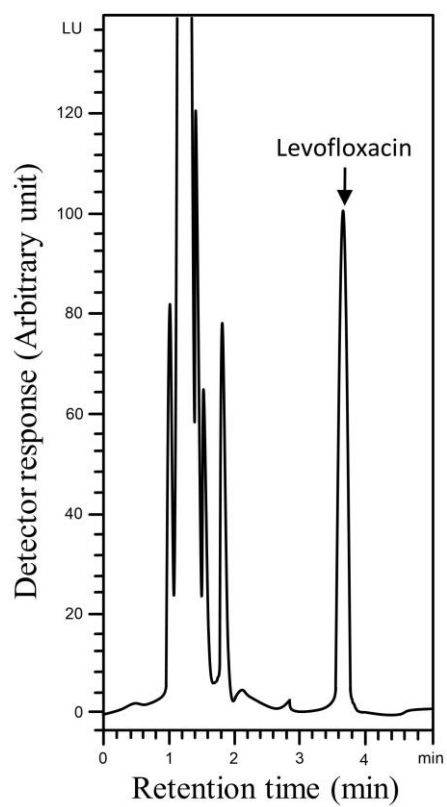

**Figure S49.** Chromatogram of serum sample collected at 3 h after the administration of a single 500 mg dose levofloxacin tablet (volunteer 5).

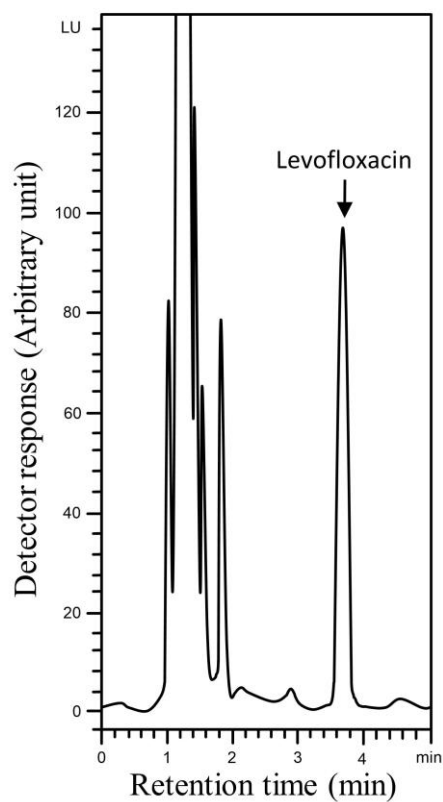

**Figure S50.** Chromatogram of serum sample collected at 4 h after the administration of a single 500 mg dose levofloxacin tablet (volunteer 5)

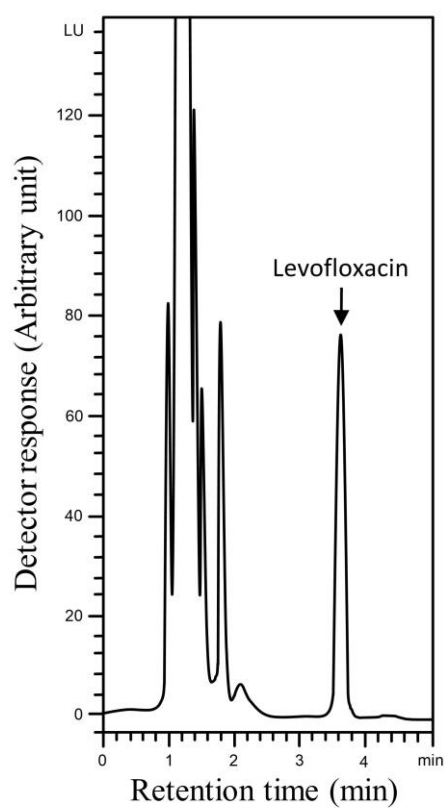

**Figure S51.** Chromatogram of serum sample collected at 6 h after the administration of a single 500 mg dose levofloxacin tablet (volunteer 5).

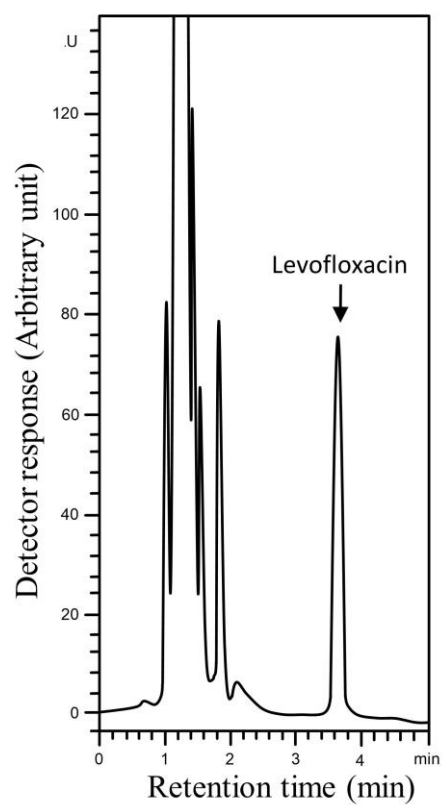

**Figure S52.** Chromatogram of serum sample collected at 8 h after the administration of a single 500 mg dose levofloxacin tablet (volunteer 5).

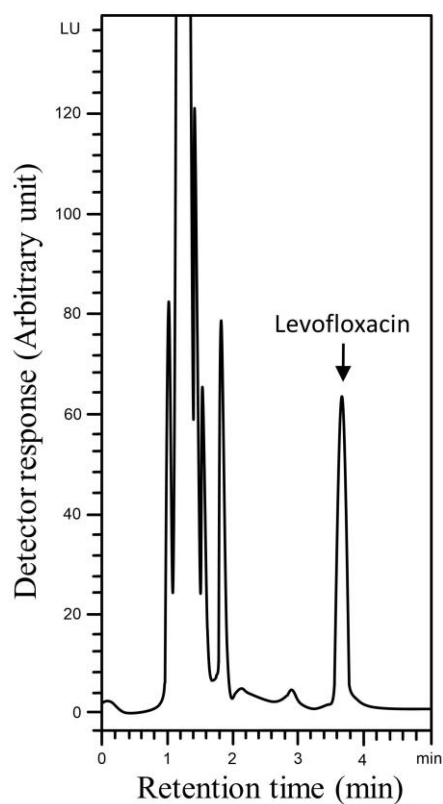

**Figure S53.** Chromatogram of serum sample collected at 10 h after the administration of a single 500 mg dose levofloxacin tablet (volunteer 5).

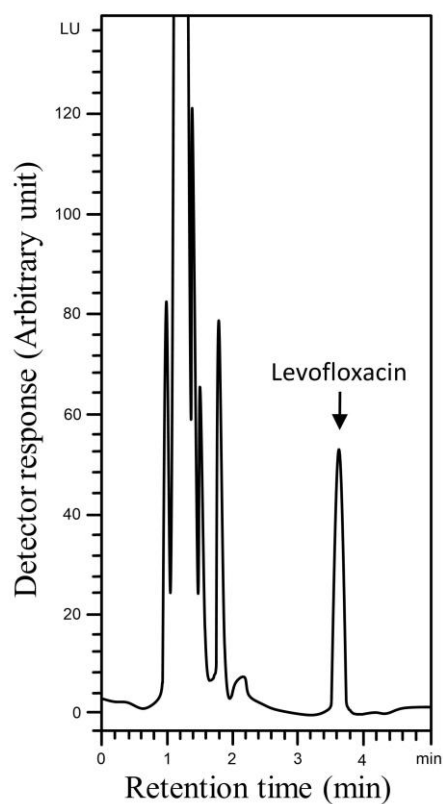

**Figure S54.** Chromatogram of serum sample collected at 12 h after the administration of a single 500 mg dose levofloxacin tablet (volunteer 5).

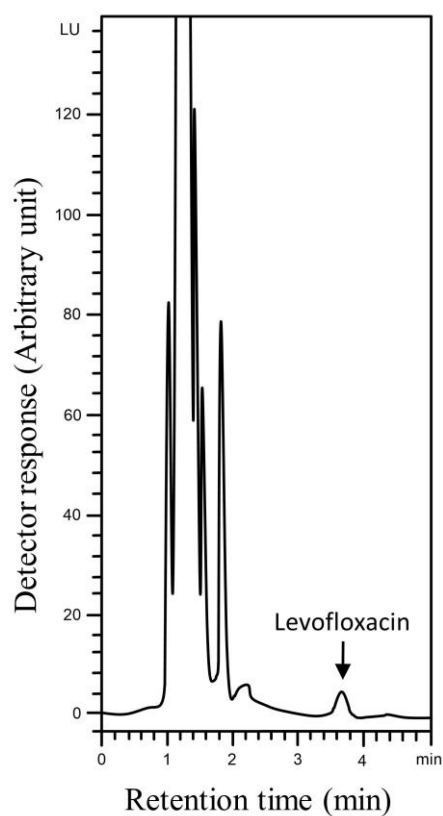

**Figure S55.** Chromatogram of serum sample collected at 24 h after the administration of a single 500 mg dose levofloxacin tablet (volunteer 5).

### Supplementary Table

**Table S1.** Mean concentrations at different sampling times after administration of a single oral of 500 mg dose levofloxacin tablet (n = 5).

| Time (h) | Concentration (mean $\pm$ SD) |          |
|----------|-------------------------------|----------|
| 0.5      | 1968.2                        | 276.9913 |
| 1        | 4738.8                        | 260.2397 |
| 2        | 5393.2                        | 487.5097 |
| 3        | 4871.2                        | 366.4911 |
| 4        | 4384.4                        | 369.7787 |
| 6        | 3697.2                        | 339.9157 |
| 8        | 3268.6                        | 261.1212 |
| 10       | 2705.4                        | 227.6396 |
| 12       | 2184.2                        | 212.4128 |
| 24       | 291                           | 43.21458 |
